# Supplementary figures and images for: Anatomic Sites and Associated Clinical Factors for Deep Dyspareunia
Source: PubMed Central journal article supplement — Sex Med. 2017 Aug 1;5(3):e184–95. doi: 10.1016/j.esxm.2017.07.001 (PMC5562494; doi:10.1016/j.esxm.2017.07.001), 2017-08-01

## Flow chart

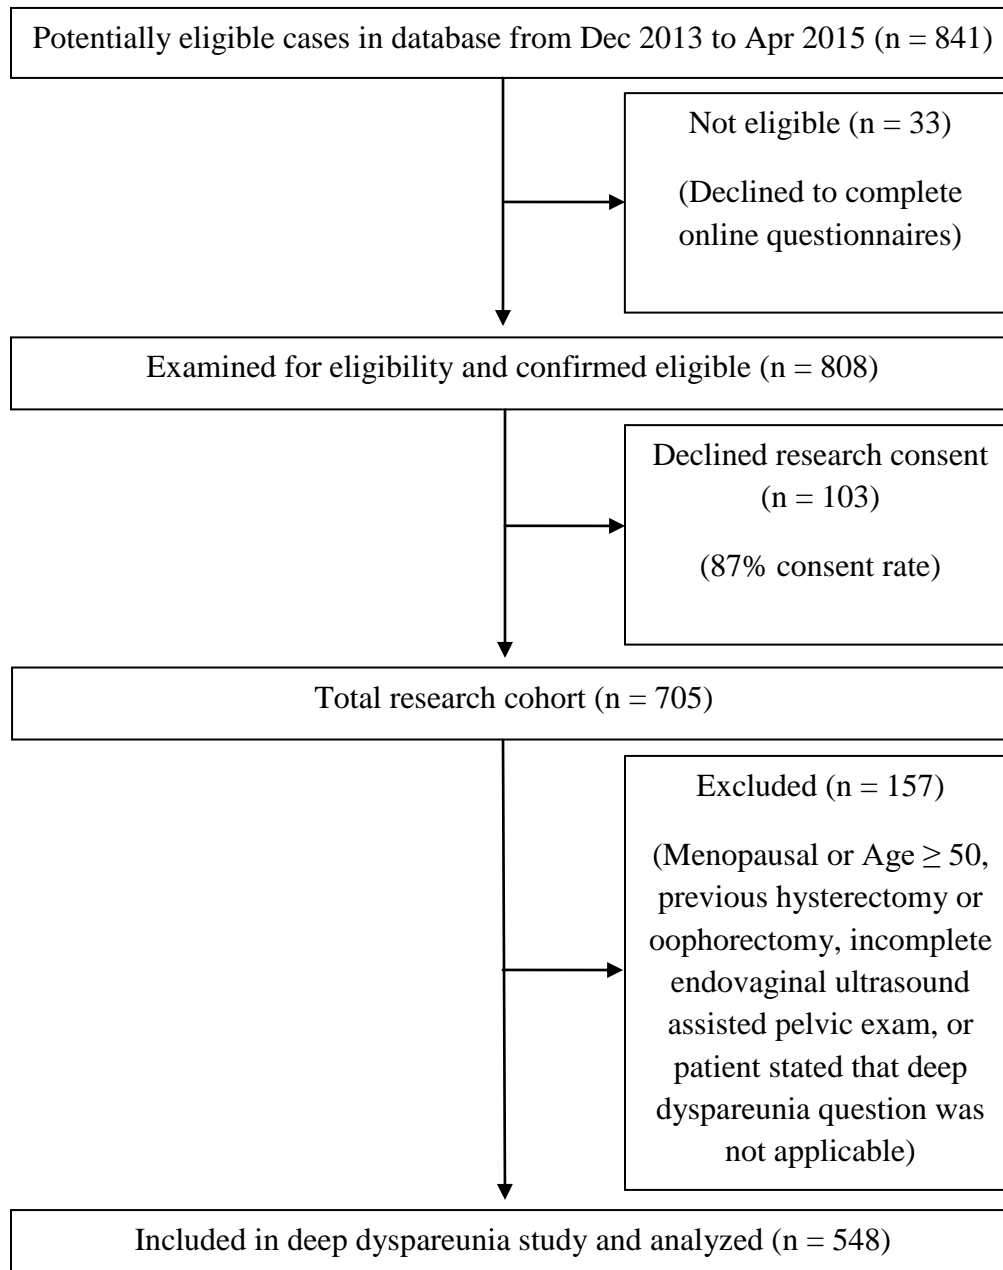

Supplement: mmc2.pdf [file mmc2.pdf]
